# Supplementary material
Source: PubMed Central journal article supplement (PMC5505685)
Supplement: NIHMS870505-supplement-Supplementary_online_content.pdf [file NIHMS870505-supplement-Supplementary_online_content.pdf]

## Supplementary Online Content

Aguirre-Acevedo DC, Lopera F, Henao E, et al. Cognitive decline in a Colombian kindred with autosomal dominant Alzheimer disease. *JAMA Neurol*. Published online February 22, 2016. doi:10.1001/jamaneurol.2015.4851.

**eFigure 1.** Flow Diagram for *PSEN* E280A Mutation Carriers

**eFigure 2.** Spaghetti Plot for Longitudinal Assessments of MMSE and CERAD Subtest in *PSENI* E280A Mutation Carriers

**eFigure 3.** Akaike and Bayesian Goodness-of-Fit Index for Model and Change Point Selection in CERAD Total Score, MMSE, and CERAD Subtest in *PSENI* E280A Mutation Carriers

**eFigure 4.** Akaike and Bayesian Goodness-of-Fit Index for Model and Change Point Selection in CERAD Total Score, MMSE, and CERAD Subtest in *PSENI* E280A Mutation Carriers With Two or More Assessments

**eFigure 5.** Akaike and Bayesian Goodness-of-Fit Index for Model and Change Point Selection in CERAD Total Score, MMSE, and CERAD Subtest in *PSENI* E280A Mutation Carriers With CDR of 0

**eTable 1.** Cognitive Decline in MMSE by Risk Factors in *PSENI* E280A Mutation Carriers

**eTable 2.** Cognitive Decline in CERAD Memory Test by Risk Factors *PSENI* E280A Mutation Carriers

**eTable 3.** Cognitive Decline in CERAD Language and Praxis Test by Risk Factors in *PSENI* E280A Mutation Carriers

**eTable 4.** Cognitive Decline in CERADts, MMSE, and CERAD Subtest in 256 *PSENI* E280A Mutation Carriers With Two or More Assessments

This supplementary material has been provided by the authors to give readers additional information about their work.

**eFigure 1. Flow Diagram for *PSEN* E280A Mutation Carriers**

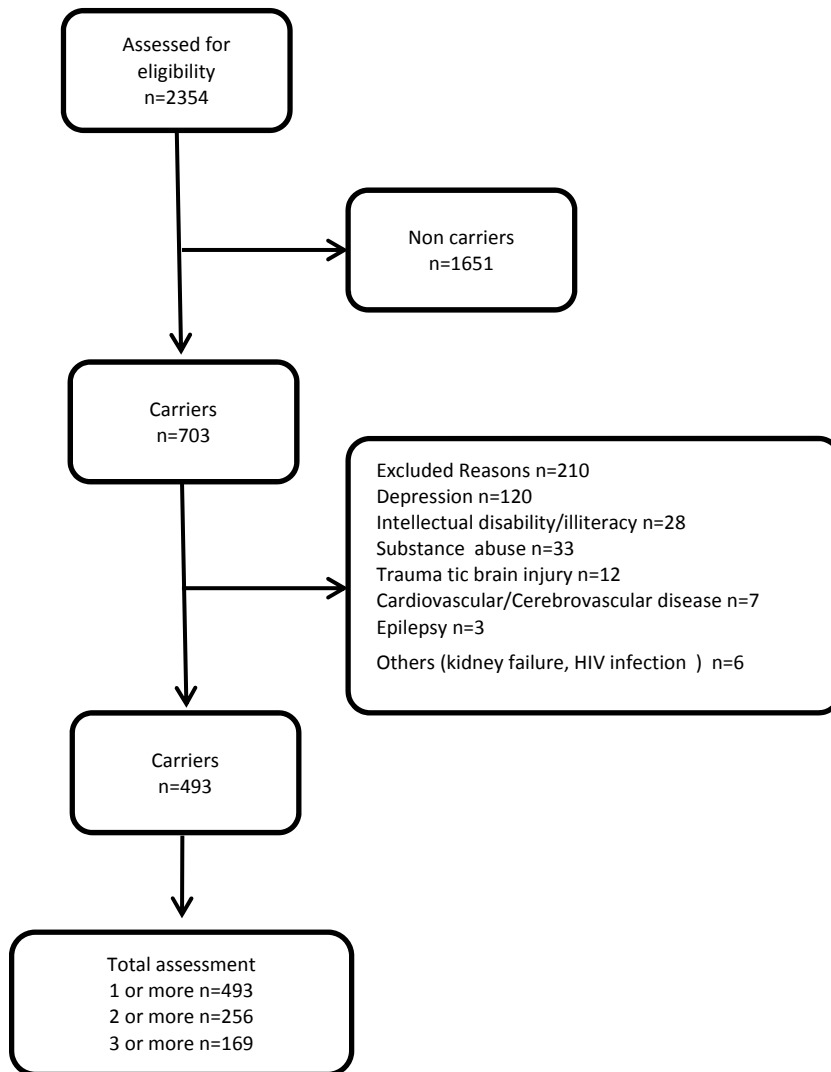

**eFigure 2. Spaghetti Plot for Longitudinal Assessments of MMSE and CERAD Subtest in *PSEN1* E280A Mutation Carriers**

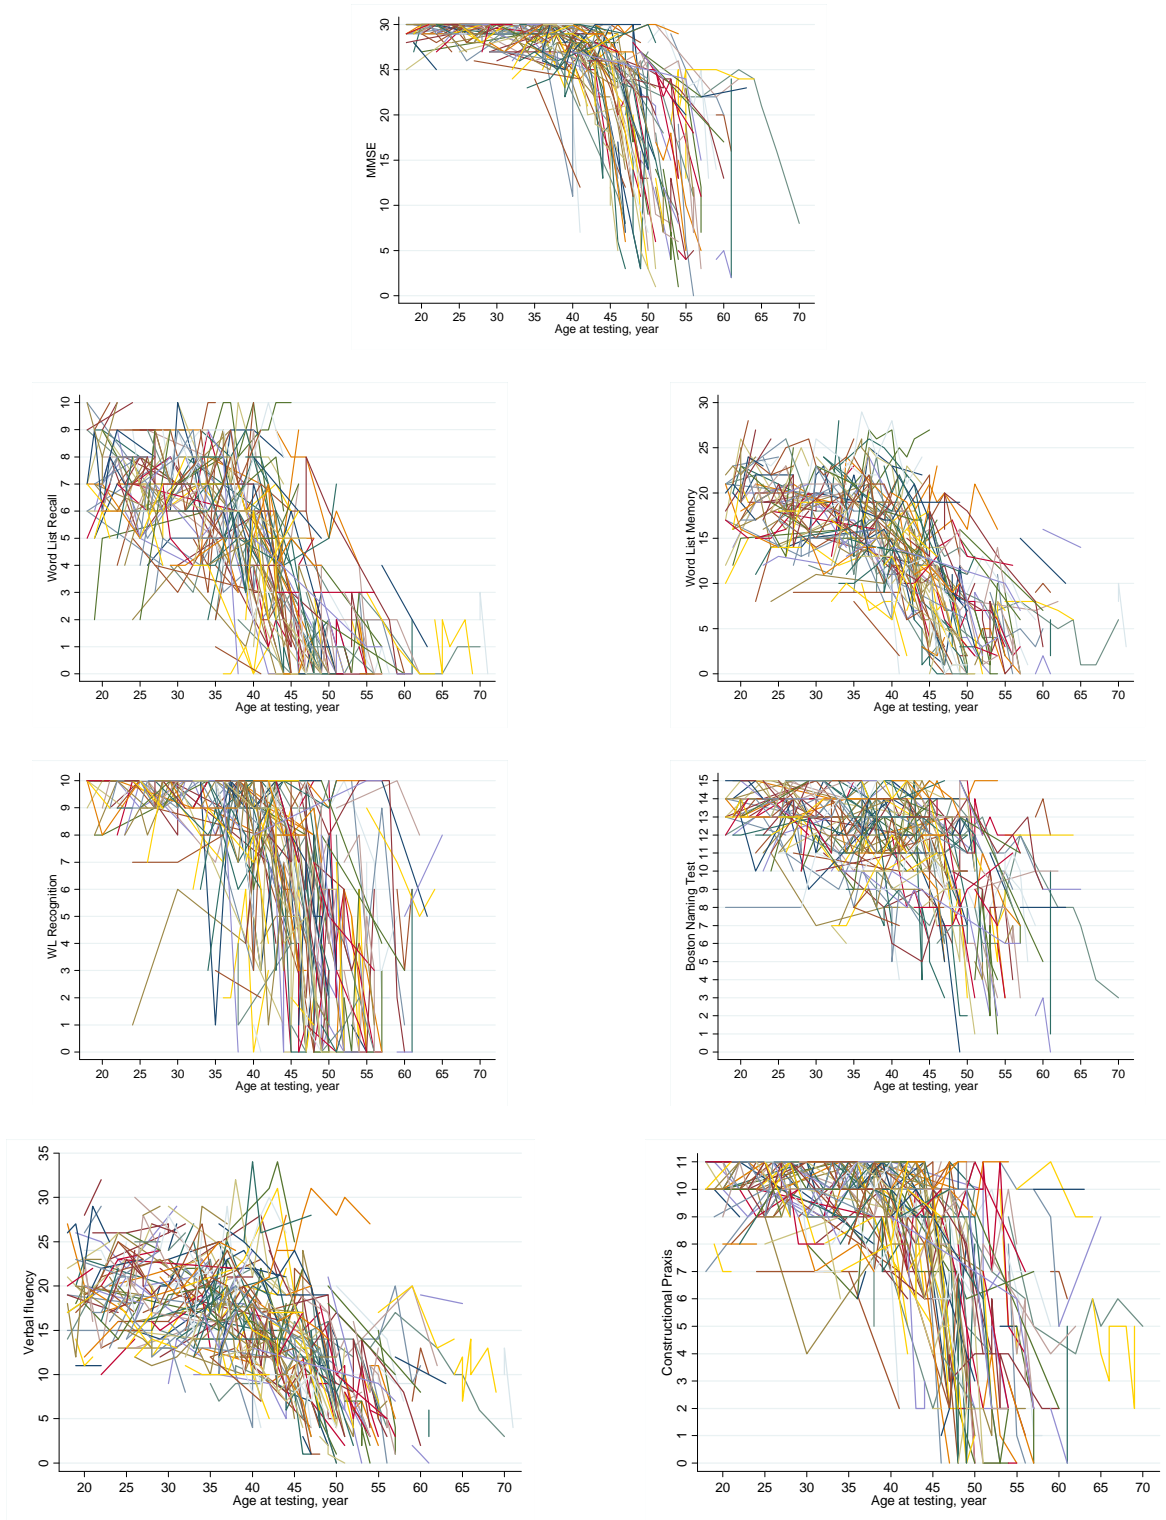

© 2016 American Medical Association. All rights reserved.

**eFigure 3. Akaike and Bayesian Goodness-of-Fit Index for Model and Change Point Selection in CERAD Total Score, MMSE, and CERAD Subtest in *PSEN1* E280A Mutation Carriers**

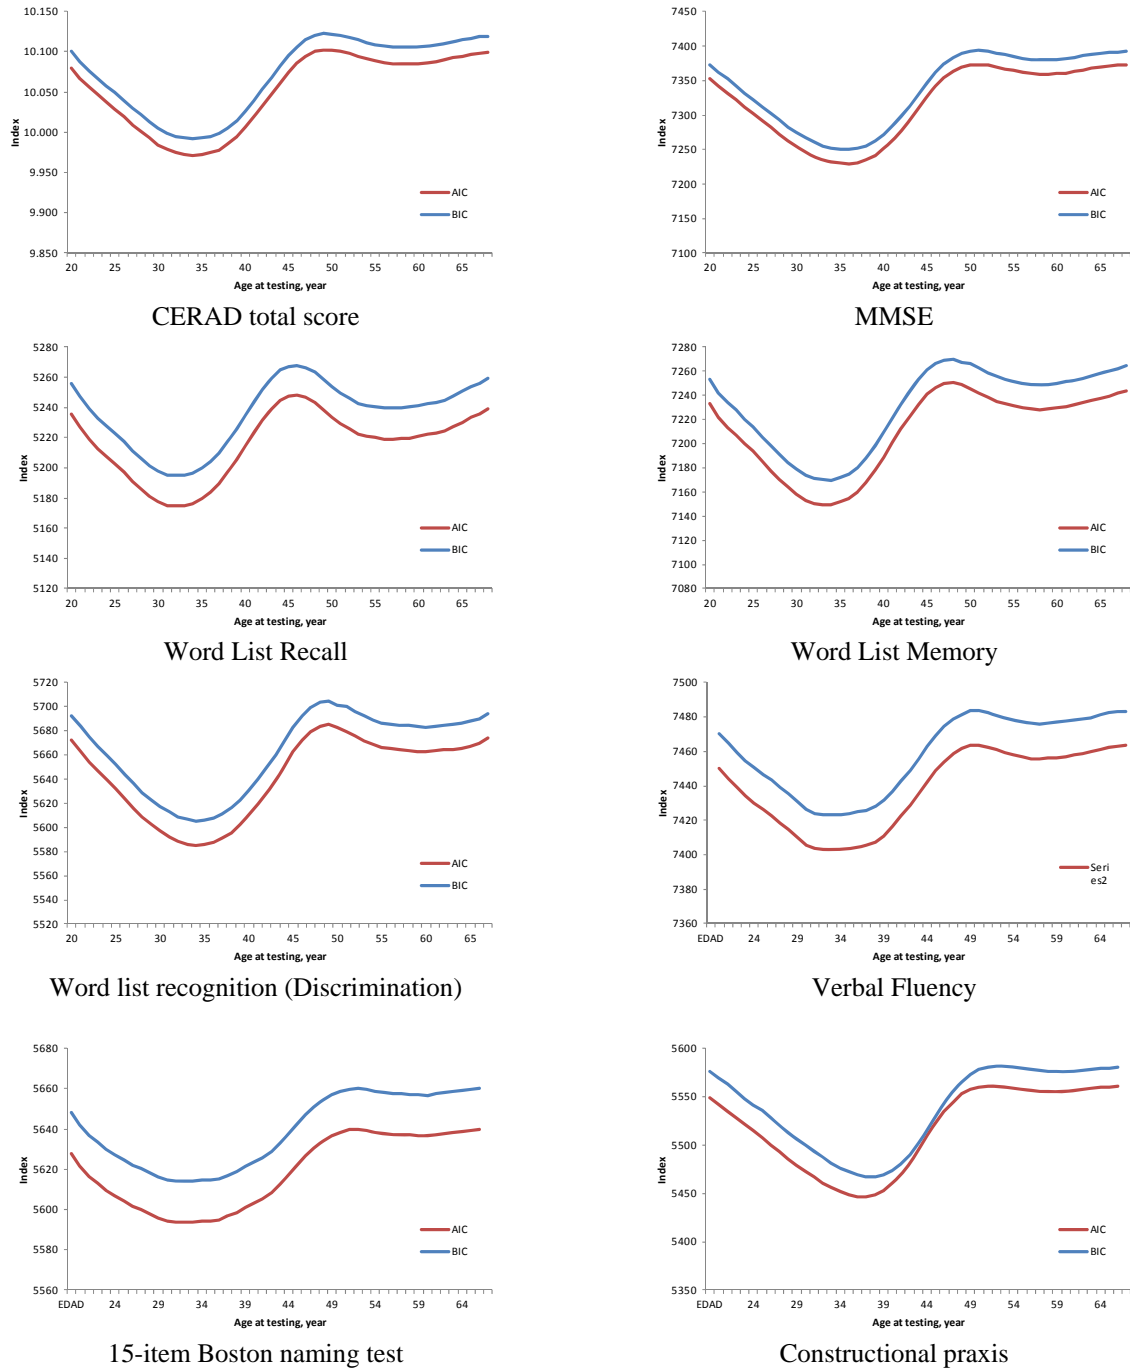

**eFigure 4. Akaike and Bayesian Goodness-of-Fit Index for Model and Change Point Selection in CERAD Total Score, MMSE, and CERAD Subtest in *PSEN1* E280A Mutation Carriers With Two or More Assessments**

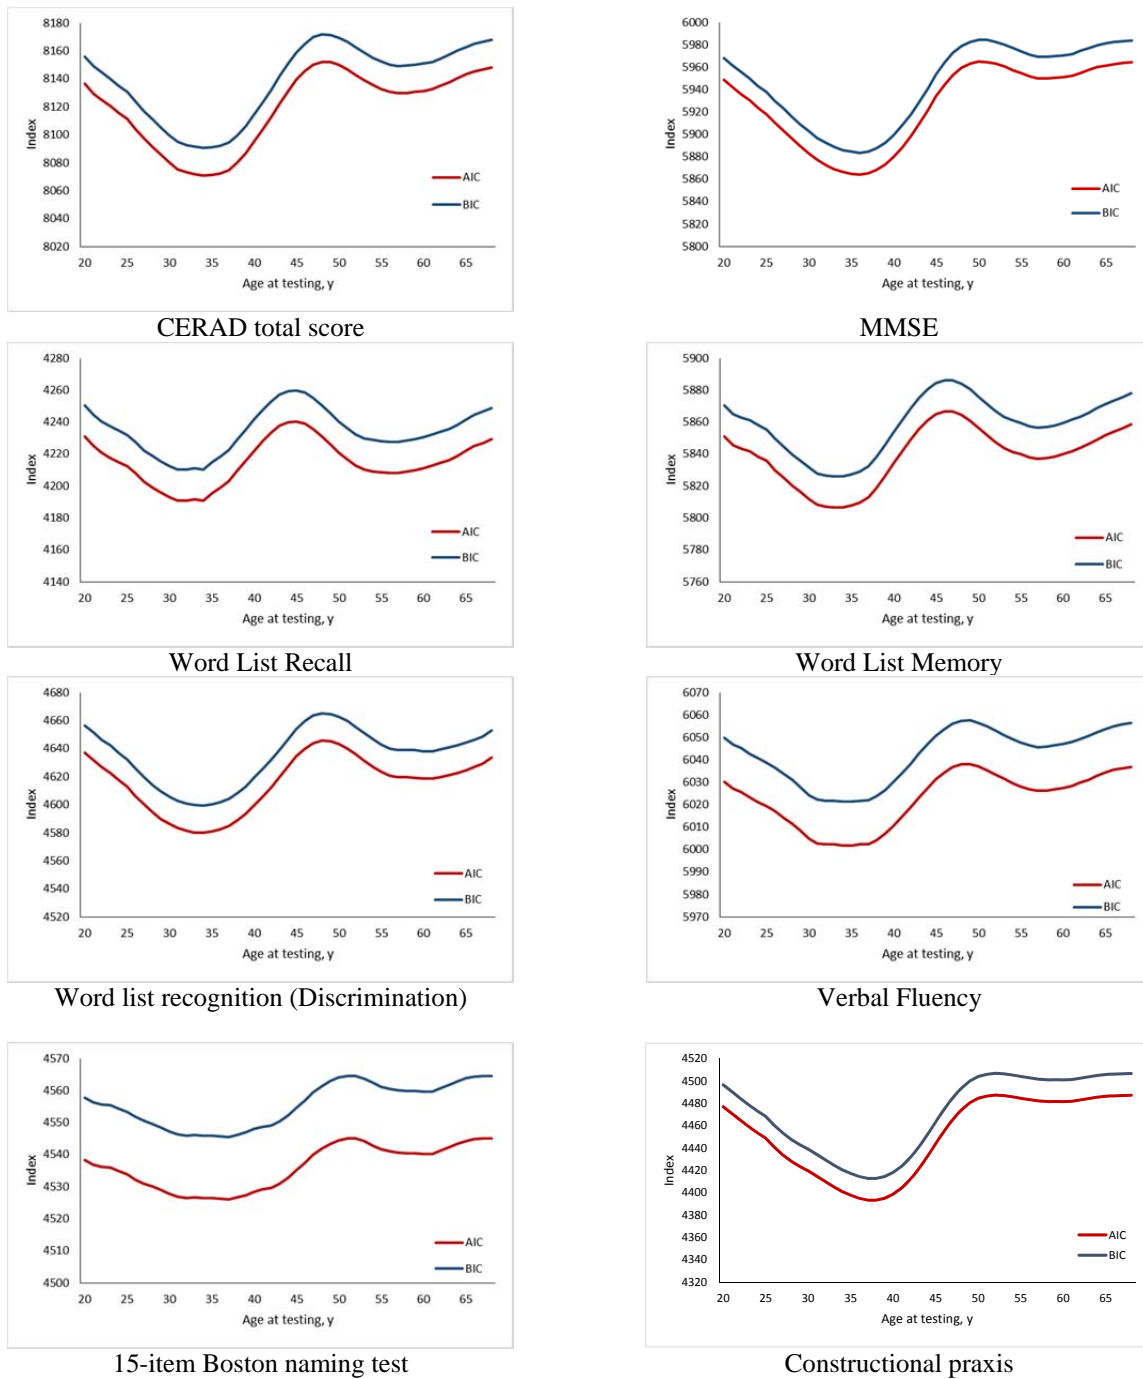

© 2016 American Medical Association. All rights reserved.

**eFigure 5. Akaike and Bayesian Goodness-of-Fit Index for Model and Change Point Selection in CERAD Total Score, MMSE, and CERAD Subtest in *PSEN1* E280A Mutation Carriers With CDR of 0**

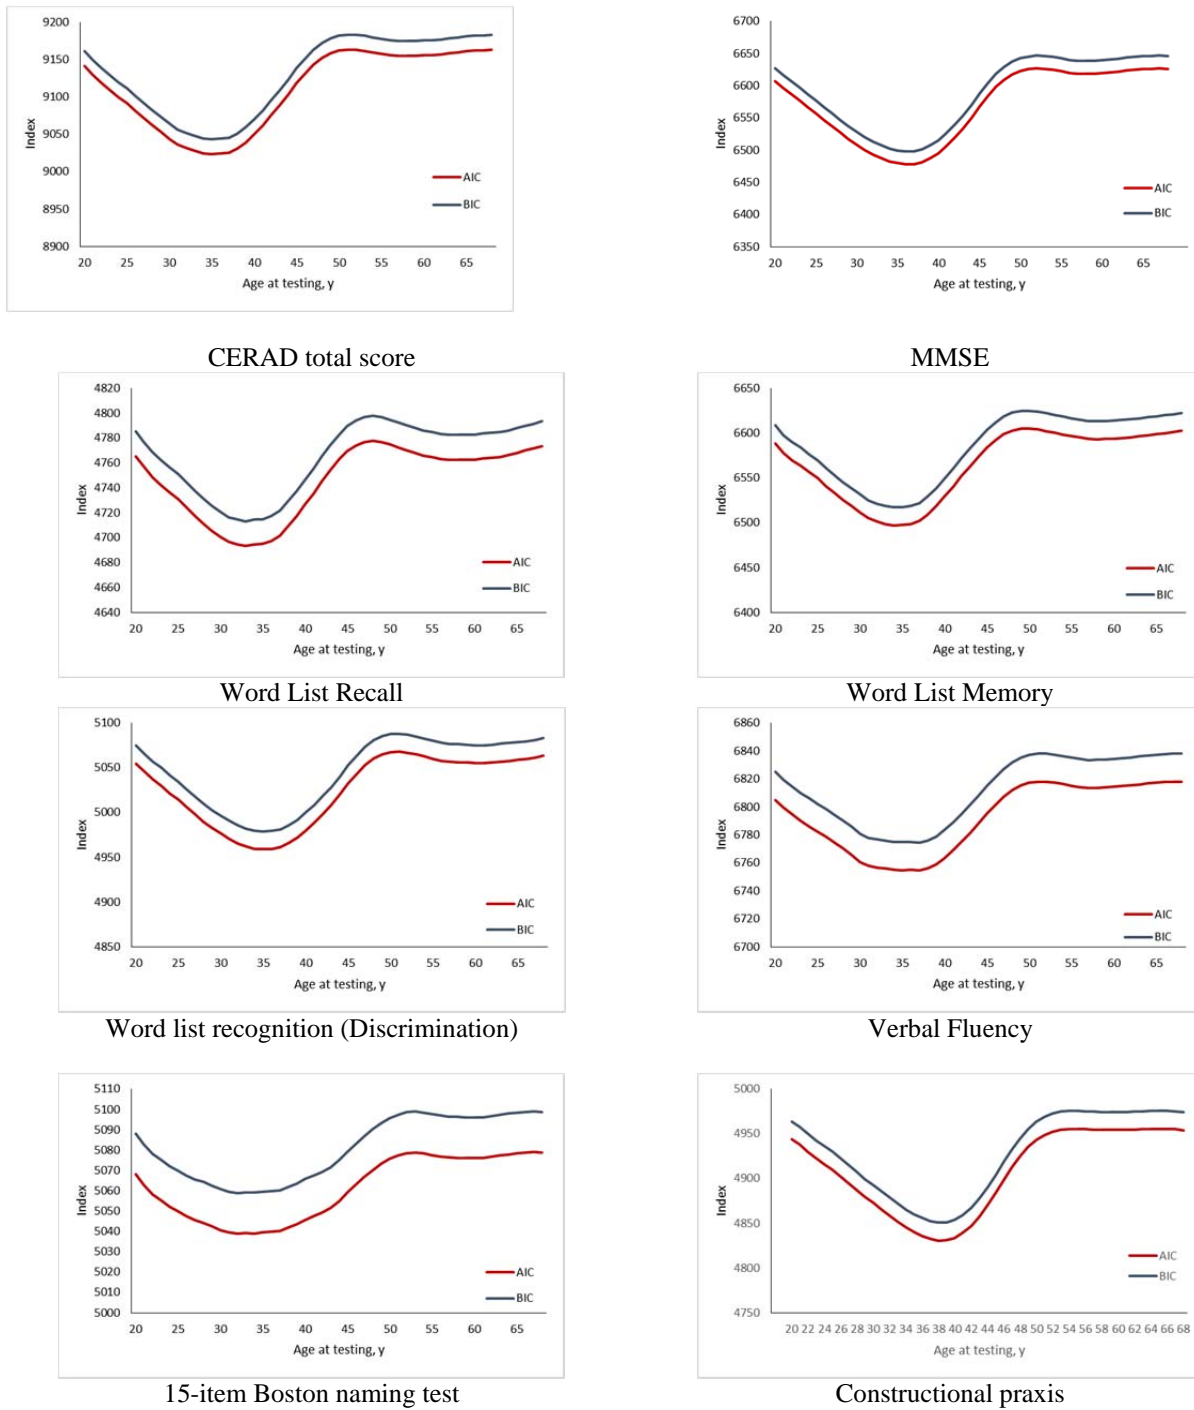

© 2016 American Medical Association. All rights reserved.

**eTable 1. Cognitive Decline in MMSE by Risk Factors in PSEN1 E280A Mutation Carriers**

|                                | Before<br>36 years<br>old | (95% CI)        | After 36<br>years<br>old | (95% CI)         |
|--------------------------------|---------------------------|-----------------|--------------------------|------------------|
| <b>Sex</b>                     |                           |                 |                          |                  |
| Female                         | 0.06                      | (-0.02 to 0.15) | -0.68                    | (-0.75 to -0.61) |
| Male                           | 0.00                      | (-0.19 to 0.20) | -0.57                    | (-0.73 to -0.41) |
| <b>Education<sup>†</sup></b>   |                           |                 |                          |                  |
| High (greater than or equal 7) | 0.02                      | (-0.03 to 0.07) | -0.70                    | (-0.80 to -0.60) |
| Low (less than 7)              | 0.02                      | (-0.10 to 0.14) | -0.65                    | (-0.72 to -0.57) |
| <b>Socioeconomic status</b>    |                           |                 |                          |                  |
| Middle/High                    | 0.06                      | (-0.03 to 0.14) | -0.74                    | (-0.87 to -0.60) |
| Low                            | 0.01                      | (-0.23 to 0.25) | -0.60                    | (-0.84 to -0.36) |
| <b>Residence area</b>          |                           |                 |                          |                  |
| Urban                          | 0.07                      | (0.00 to 0.13)  | -0.68                    | (-0.82 to -0.54) |
| Rural                          | -0.05                     | (-0.27 to 0.17) | -0.53                    | (-0.79 to -0.27) |
| <b>Occupation type</b>         |                           |                 |                          |                  |
| Non-Manual                     | 0.04                      | (-0.28 to 0.36) | -0.60                    | (-0.80 to -0.41) |
| Manual                         | 0.04                      | (-0.34 to 0.41) | -0.64                    | (-1.15 to -0.12) |
| <b>Marital status</b>          |                           |                 |                          |                  |
| Single                         | 0.16                      | (-0.07 to 0.40) | -0.83                    | (-1.04 to -0.61) |
| Married                        | 0.07                      | (-0.02 to 0.16) | -0.55                    | (-0.62 to -0.48) |
| <b>HTA</b>                     |                           |                 |                          |                  |
| Present                        | 0.12                      | (-0.40 to 0.64) | -0.49                    | (-0.70 to -0.28) |
| Absent                         | 0.09                      | (-0.35 to 0.53) | -0.61                    | (-0.75 to -0.48) |
| <b>Dyslipidemia</b>            |                           |                 |                          |                  |
| Present                        | 0.26                      | (-0.18 to 0.70) | -0.38                    | (-0.60 to -0.15) |
| Absent                         | 0.08                      | (0.00 to 0.16)  | -0.63                    | (-0.70 to -0.55) |
| <b>Diabetes</b>                |                           |                 |                          |                  |
| Present                        | 1.11                      | (-0.27 to 2.48) | -1.02                    | (-1.51 to -0.52) |
| Absent                         | 0.09                      | (0.01 to 0.16)  | -0.58                    | (-0.65 to -0.51) |
| <b>Tobacco use</b>             |                           |                 |                          |                  |
| Present                        | 0.11                      | (-0.08 to 0.30) | -0.67                    | (-0.75 to -0.59) |
| Absent                         | 0.08                      | (-0.01 to 0.16) | -0.53                    | (-0.62 to -0.45) |
| <b>Alcohol use</b>             |                           |                 |                          |                  |
| Present                        | 0.01                      | (-0.29 to 0.31) | -0.72                    | (-0.93 to -0.50) |
| Absent                         | 0.09                      | (-0.12 to 0.31) | -0.55                    | (-0.69 to -0.42) |
| <b>APOE ε4</b>                 |                           |                 |                          |                  |
| Present                        | -0.03                     | (-0.47 to 0.41) | -0.79                    | (-1.16 to -0.41) |
| Absent                         | 0.09                      | (-0.10 to 0.28) | -0.93                    | (-1.06 to -0.79) |

Adjusted coefficients by other factors; CI: Confidence interval; HTA: Hypertension

**eTable 2. Cognitive Decline in CERAD Memory Test by Risk Factors *PSEN1* E280A Mutation Carriers**

|                                | Word list recall    |                 |                    |                  | Word list memory    |                 |                    |                  | Word list Recognition |                 |                    |                  |
|--------------------------------|---------------------|-----------------|--------------------|------------------|---------------------|-----------------|--------------------|------------------|-----------------------|-----------------|--------------------|------------------|
|                                | Before 32 years old | (95% CI)        | After 32 years old | (95% CI)         | Before 34 years old | (95% CI)        | After 34 years old | (95% CI)         | Before 34 years old   | (95% CI)        | After 34 years old | (95% CI)         |
| <b>Sex</b>                     |                     |                 |                    |                  |                     |                 |                    |                  |                       |                 |                    |                  |
| Female                         | -0.02               | (-0.06 to 0.02) | -0.23              | (-0.26 to -0.21) | -0.01               | (-0.09 to 0.07) | -0.58              | (-0.64 to -0.51) | 0.01                  | (-0.03 to 0.05) | -0.30              | (-0.34 to -0.27) |
| Male                           | 0.00                | (-0.10 to 0.09) | -0.25              | (-0.31 to -0.18) | 0.06                | (-0.12 to 0.25) | -0.59              | (-0.75 to -0.44) | 0.01                  | (-0.09 to 0.10) | -0.28              | (-0.37 to -0.20) |
| <b>Education†</b>              |                     |                 |                    |                  |                     |                 |                    |                  |                       |                 |                    |                  |
| High (greater than or equal 7) | -0.02               | (-0.06 to 0.02) | -0.39              | (-0.44 to -0.34) | 0.02                | (-0.06 to 0.10) | -0.81              | (-0.93 to -0.70) | 0.00                  | (-0.04 to 0.03) | -0.35              | (-0.40 to -0.30) |
| Low (less than 7)              | -0.05               | (-0.10 to 0.00) | -0.21              | (-0.24 to -0.18) | 0.04                | (-0.07 to 0.14) | -0.51              | (-0.57 to -0.45) | 0.01                  | (-0.05 to 0.07) | -0.27              | (-0.31 to -0.23) |
| <b>Socioeconomic status</b>    |                     |                 |                    |                  |                     |                 |                    |                  |                       |                 |                    |                  |
| Middle/High                    | -0.02               | (-0.06 to 0.01) | -0.28              | (-0.35 to -0.21) | 0.07                | (-0.02 to 0.15) | -0.72              | (-0.84 to -0.59) | 0.01                  | (-0.04 to 0.05) | -0.35              | (-0.41 to -0.28) |
| Low                            | -0.02               | (-0.15 to 0.10) | -0.23              | (-0.34 to -0.11) | -0.03               | (-0.26 to 0.20) | -0.52              | (-0.75 to -0.29) | 0.00                  | (-0.12 to 0.12) | -0.26              | (-0.38 to -0.14) |
| <b>Residence area</b>          |                     |                 |                    |                  |                     |                 |                    |                  |                       |                 |                    |                  |
| Urban                          | -0.02               | (-0.04 to 0.01) | -0.25              | (-0.32 to -0.18) | 0.02                | (-0.04 to 0.08) | -0.62              | (-0.75 to -0.49) | 0.02                  | (-0.01 to 0.06) | -0.33              | (-0.40 to -0.26) |
| Rural                          | -0.01               | (-0.11 to 0.10) | -0.20              | (-0.32 to -0.08) | 0.02                | (-0.18 to 0.23) | -0.48              | (-0.72 to -0.24) | -0.04                 | (-0.14 to 0.07) | -0.21              | (-0.34 to -0.07) |
| <b>Occupation type</b>         |                     |                 |                    |                  |                     |                 |                    |                  |                       |                 |                    |                  |
| Non-Manual                     | 0.00                | (-0.12 to 0.11) | -0.22              | (-0.30 to -0.13) | 0.02                | (-0.26 to 0.30) | -0.54              | (-0.71 to -0.37) | 0.01                  | (-0.14 to 0.17) | -0.20              | (-0.29 to -0.12) |
| Manual                         | -0.01               | (-0.18 to 0.15) | -0.24              | (-0.44 to -0.04) | 0.02                | (-0.30 to 0.35) | -0.58              | (-1.03 to -0.13) | 0.01                  | (-0.16 to 0.17) | -0.30              | (-0.54 to -0.05) |
| <b>Marital status</b>          |                     |                 |                    |                  |                     |                 |                    |                  |                       |                 |                    |                  |
| Single                         | 0.04                | (-0.08 to 0.16) | -0.23              | (-0.31 to -0.14) | 0.14                | (-0.09 to 0.36) | -0.58              | (-0.79 to -0.38) | 0.06                  | (-0.06 to 0.18) | -0.31              | (-0.43 to -0.19) |
| Married                        | 0.03                | (-0.02 to 0.08) | -0.20              | (-0.23 to -0.17) | 0.14                | (0.04 to 0.23)  | -0.48              | (-0.55 to -0.42) | 0.03                  | (-0.02 to 0.09) | -0.26              | (-0.30 to -0.22) |
| <b>HTA</b>                     |                     |                 |                    |                  |                     |                 |                    |                  |                       |                 |                    |                  |
| Present                        | -0.01               | (-0.45 to 0.24) | -0.22              | (-0.31 to -0.13) | 0.14                | (-0.42 to 0.70) | -0.48              | (-0.69 to -0.28) | 0.00                  | (-0.31 to 0.31) | -0.25              | (-0.37 to -0.14) |
| Absent                         | 0.03                | (-0.26 to 0.33) | -0.20              | (-0.25 to -0.14) | 0.13                | (-0.35 to 0.61) | -0.50              | (-0.64 to -0.37) | 0.04                  | (-0.22 to 0.30) | -0.27              | (-0.35 to -0.20) |
| <b>Dyslipidemia</b>            |                     |                 |                    |                  |                     |                 |                    |                  |                       |                 |                    |                  |
| Present                        | -0.05               | (-0.28 to 0.18) | -0.25              | (-0.34 to -0.15) | 0.09                | (-0.35 to 0.53) | -0.42              | (-0.63 to -0.21) | 0.07                  | (-0.16 to 0.30) | -0.23              | (-0.35 to -0.11) |
| Absent                         | 0.00                | (-0.01 to       | -0.19              | (-0.22 to -      | 0.13                | (0.05 to        | -0.51              | (-0.58 to -      | 0.04                  | (-0.01 to       | -0.28              | (-0.32 to -      |



|                    |       |                 |       |                  |      |                 |       |                  |       |                 |       |                  |
|--------------------|-------|-----------------|-------|------------------|------|-----------------|-------|------------------|-------|-----------------|-------|------------------|
|                    | 4     | 0.08)           |       | 0.16)            |      | 0.22)           |       | 0.44)            |       | 0.09)           |       | 0.24)            |
| <b>Diabetes</b>    |       |                 |       |                  |      |                 |       |                  |       |                 |       |                  |
| Present            | 0.46  | (-0.50 to 1.41) | -0.37 | (-0.56 to -0.17) | 0.40 | (-1.02 to 1.83) | -0.91 | (-1.34 to -0.47) | 0.39  | (-0.36 to 1.15) | -0.46 | (-0.71 to -0.22) |
| Absent             | 0.04  | (-0.01 to 0.08) | -0.20 | (-0.23 to -0.17) | 0.13 | (0.05 to 0.21)  | -0.49 | (-0.56 to -0.43) | 0.04  | (-0.01 to 0.09) | -0.27 | (-0.30 to -0.23) |
| <b>Tobacco use</b> |       |                 |       |                  |      |                 |       |                  |       |                 |       |                  |
| Present            | 0.00  | (-0.09 to 0.09) | -0.19 | (-0.22 to -0.16) | 0.06 | (-0.13 to 0.25) | -0.52 | (-0.60 to -0.44) | 0.02  | (-0.08 to 0.13) | -0.29 | (-0.34 to -0.25) |
| Absent             | 0.04  | (0.00 to 0.09)  | -0.21 | (-0.24 to -0.17) | 0.14 | (0.05 to 0.22)  | -0.48 | (-0.56 to -0.41) | 0.04  | (-0.01 to 0.09) | -0.26 | (-0.30 to -0.21) |
| <b>Alcohol use</b> |       |                 |       |                  |      |                 |       |                  |       |                 |       |                  |
| Present            | -0.04 | (-0.19 to 0.12) | -0.21 | (-0.30 to -0.13) | 0.12 | (-0.17 to 0.41) | -0.62 | (-0.82 to -0.41) | 0.02  | (-0.13 to 0.18) | -0.27 | (-0.39 to -0.16) |
| Absent             | 0.04  | (-0.07 to 0.15) | -0.20 | (-0.26 to -0.14) | 0.13 | (-0.07 to 0.34) | -0.47 | (-0.61 to -0.34) | 0.04  | (-0.06 to 0.15) | -0.27 | (-0.35 to -0.19) |
| <b>APOE ε4</b>     |       |                 |       |                  |      |                 |       |                  |       |                 |       |                  |
| Present            | -0.11 | (-0.35 to 0.12) | -0.22 | (-0.36 to -0.08) | 0.25 | (-0.64 to 1.14) | -0.76 | (-1.06 to -0.46) | -0.04 | (-0.32 to 0.25) | -0.33 | (-0.51 to -0.14) |
| Absent             | -0.05 | (-0.14 to 0.05) | -0.30 | (-0.35 to -0.25) | 0.02 | (-0.17 to 0.21) | -0.67 | (-0.78 to -0.57) | 0.03  | (-0.09 to 0.16) | -0.34 | (-0.40 to -0.27) |

Adjusted coefficients by othe factors; CI: Confidence interval; HTA: Hypertension

**eTable 3. Cognitive Decline in CERAD Language and Praxis Test by Risk Factors in PSEN1 E280A Mutation Carriers**

|                                | Verbal fluency      |                 |                    |                  | 15-item Boston naming test |                 |                    |                  | Constructional praxis |                 |                |                  |
|--------------------------------|---------------------|-----------------|--------------------|------------------|----------------------------|-----------------|--------------------|------------------|-----------------------|-----------------|----------------|------------------|
|                                | Before 34 years old | (95% CI)        | After 34 years old | (95% CI)         | Before 34 years old        | (95% CI)        | After 34 years old | (95% CI)         | Before 38 years       | (95% CI)        | After 38 years | (95% CI)         |
| <b>Sex</b>                     |                     |                 |                    |                  |                            |                 |                    |                  |                       |                 |                |                  |
| Female                         | 0.14                | (0.04 to 0.23)  | -0.46              | (-0.53 to -0.39) | 0.05                       | (0.01 to 0.09)  | -0.20              | (-0.23 to -0.17) | 0.00                  | (-0.03 to 0.04) | -0.31          | (-0.34 to -0.27) |
| Male                           | 0.06                | (-0.16 to 0.28) | -0.45              | (-0.62 to -0.29) | -0.04                      | (-0.14 to 0.07) | -0.15              | (-0.22 to -0.08) | 0.00                  | (-0.08 to 0.09) | -0.27          | (-0.35 to -0.18) |
| <b>Education†</b>              |                     |                 |                    |                  |                            |                 |                    |                  |                       |                 |                |                  |
| High (greater than or equal 7) | 0.13                | (0.04 to 0.22)  | -0.77              | (-0.94 to -0.60) | 0.01                       | (-0.02 to 0.04) | -0.28              | (-0.36 to -0.21) | 0.00                  | (-0.03 to 0.03) | -0.33          | (-0.40 to -0.27) |
| Low (less than 7)              | -0.02               | (-0.11 to 0.07) | -0.49              | (-0.56 to -0.42) | -0.05                      | (-0.10 to 0.00) | -0.19              | (-0.23 to -0.16) | 0.01                  | (-0.04 to 0.06) | -0.29          | (-0.33 to -0.25) |
| <b>Socioeconomic status</b>    |                     |                 |                    |                  |                            |                 |                    |                  |                       |                 |                |                  |
| Middle/High                    | 0.16                | (0.06 to 0.25)  | -0.61              | (-0.76 to -0.46) | 0.03                       | (-0.01 to 0.07) | -0.25              | (-0.32 to -0.18) | 0.01                  | (-0.04 to 0.05) | -0.33          | (-0.38 to -0.27) |
| Low                            | 0.04                | (-0.24 to 0.32) | -0.41              | (-0.68 to -0.15) | -0.01                      | (-0.14 to 0.12) | -0.16              | (-0.28 to -0.04) | -0.01                 | (-0.11 to 0.09) | -0.28          | (-0.39 to -0.17) |
| <b>Residence area</b>          |                     |                 |                    |                  |                            |                 |                    |                  |                       |                 |                |                  |
| Urban                          | 0.13                | (0.06 to 0.20)  | -0.49              | (-0.65 to -0.33) | 0.03                       | (0.00 to 0.05)  | -0.19              | (-0.27 to -0.11) | 0.00                  | (-0.03 to 0.04) | -0.31          | (-0.37 to -0.25) |
| Rural                          | 0.03                | (-0.22 to 0.27) | -0.39              | (-0.67 to -0.11) | -0.02                      | (-0.14 to 0.10) | -0.18              | (-0.31 to -0.05) | -0.01                 | (-0.11 to 0.08) | -0.24          | (-0.36 to -0.12) |
| <b>Occupation type</b>         |                     |                 |                    |                  |                            |                 |                    |                  |                       |                 |                |                  |
| Non-Manual                     | 0.11                | (-0.19 to 0.42) | -0.34              | (-0.54 to -0.14) | 0.01                       | (-0.12 to 0.14) | -0.10              | (-0.19 to 0.00)  | -0.01                 | (-0.20 to 0.18) | -0.27          | (-0.36 to -0.18) |
| Manual                         | 0.10                | (-0.29 to 0.49) | -0.47              | (-0.98 to 0.04)  | 0.01                       | (-0.18 to 0.20) | -0.19              | (-0.41 to 0.04)  | 0.00                  | (-0.17 to 0.17) | -0.29          | (-0.57 to -0.01) |
| <b>Marital status</b>          |                     |                 |                    |                  |                            |                 |                    |                  |                       |                 |                |                  |
| Single                         | 0.17                | (-0.10 to 0.44) | -0.42              | (-0.64 to -0.19) | 0.07                       | (-0.06 to 0.20) | -0.20              | (-0.29 to -0.11) | 0.02                  | (-0.08 to 0.12) | -0.39          | (-0.50 to -0.27) |
| Married                        | 0.22                | (0.11 to 0.33)  | -0.38              | (-0.46 to -0.31) | 0.03                       | (-0.02 to 0.08) | -0.15              | (-0.18 to -0.12) | 0.00                  | (-0.04 to 0.04) | -0.28          | (-0.31 to -0.24) |
| <b>HTA</b>                     |                     |                 |                    |                  |                            |                 |                    |                  |                       |                 |                |                  |
| Present                        | 0.40                | (-0.27 to 1.07) | -0.43              | (-0.66 to -0.21) | -0.01                      | (-0.33 to 0.31) | -0.10              | (-0.19 to 0.00)  | 0.05                  | (-0.16 to 0.26) | -0.30          | (-0.41 to -0.19) |
| Absent                         | 0.19                | (-0.39 to 0.77) | -0.38              | (-0.53 to -0.23) | 0.05                       | (-0.23 to 0.32) | -0.17              | (-0.24 to -0.11) | 0.00                  | (-0.17 to 0.17) | -0.29          | (-0.36 to -0.22) |
| <b>Dyslipidemia</b>            |                     |                 |                    |                  |                            |                 |                    |                  |                       |                 |                |                  |
| Present                        | 0.17                | (-0.35 to 0.68) | -0.34              | (-0.58 to -0.10) | 0.15                       | (-0.09 to 0.38) | -0.09              | (-0.19 to 0.01)  | 0.16                  | (-0.03 to 0.35) | -0.22          | (-0.34 to -0.10) |
| Absent                         | 0.20                | (0.10 to 0.29)  | -0.39              | (-0.47 to -0.32) | 0.04                       | (0.00 to 0.08)  | -0.17              | (-0.20 to -0.14) | 0.00                  | (-0.04 to 0.03) | -0.31          | (-0.34 to -0.27) |
| <b>Diabetes</b>                |                     |                 |                    |                  |                            |                 |                    |                  |                       |                 |                |                  |
| Present                        | -0.10               | (-1.83 to 1.63) | -0.34              | (-0.83 to 0.14)  | 0.04                       | (-0.82 to 0.90) | -0.17              | (-0.38 to 0.05)  | 0.29                  | (-0.22 to 0.79) | -0.33          | (-0.58 to -0.07) |
| Absent                         | 0.20                | (0.11 to 0.29)  | -0.39              | (-0.46 to -0.31) | 0.04                       | (0.00 to 0.09)  | -0.16              | (-0.19 to -0.13) | 0.00                  | (-0.03 to 0.04) | -0.29          | (-0.33 to -0.25) |
| <b>Tobacco use</b>             |                     |                 |                    |                  |                            |                 |                    |                  |                       |                 |                |                  |
| Present                        | 0.23                | (0.02 to 0.44)  | -0.46              | (-0.54 to -0.37) | 0.10                       | (0.01 to 0.20)  | -0.19              | (-0.22 to -0.15) | 0.04                  | (-0.06 to 0.13) | -0.33          | (-0.37 to -0.29) |
| Absent                         | 0.19                | (0.09 to 0.28)  | -0.34              | (-0.43 to -0.26) | 0.03                       | (-0.01 to 0.08) | -0.14              | (-0.18 to -0.11) | 0.00                  | (-0.04 to 0.03) | -0.26          | (-0.30 to -0.21) |
| <b>Alcohol use</b>             |                     |                 |                    |                  |                            |                 |                    |                  |                       |                 |                |                  |
| Present                        | 0.27                | (-0.07 to 0.62) | -0.52              | (-0.75 to -0.30) | 0.05                       | (-0.12 to 0.21) | -0.20              | (-0.29 to -0.11) | -0.02                 | (-0.15 to 0.11) | -0.36          | (-0.47 to -0.25) |
| Absent                         | 0.19                | (-0.06 to 0.44) | -0.36              | (-0.50 to -0.21) | 0.04                       | (-0.08 to 0.17) | -0.15              | (-0.21 to -0.09) | 0.01                  | (-0.08 to 0.10) | -0.27          | (-0.34 to -0.19) |

| <i>APOE ε4</i> |           |                    |       |                      |           |                    |       |                      |           |                    |       |                      |
|----------------|-----------|--------------------|-------|----------------------|-----------|--------------------|-------|----------------------|-----------|--------------------|-------|----------------------|
| Present        | -<br>0.08 | (-0.70 to<br>0.54) | -0.52 | (-0.86 to -<br>0.18) | -<br>0.12 | (-0.38 to<br>0.13) | -0.16 | (-0.33 to<br>0.01)   | -<br>0.02 | (-0.21 to<br>0.16) | -0.38 | (-0.57 to -<br>0.18) |
| Absent         | 0.06      | (-0.19 to<br>0.32) | -0.48 | (-0.60 to -<br>0.35) | -<br>0.03 | (-0.14 to<br>0.08) | -0.24 | (-0.30 to -<br>0.18) | 0.05      | (-0.03 to<br>0.13) | -0.47 | (-0.54 to -<br>0.39) |

Adjusted coefficients by other factors; CI: Confidence interval; HTA: Hypertension, diabetes, tobacco and alcohol use.

**eTable 4. Cognitive Decline in CERADts, MMSE, and CERAD Subtest in 256 PSEN1 E280A Mutation Carriers With Two or More Assessments**

|         | Coefficients |                  |           |                 |          |                  |
|---------|--------------|------------------|-----------|-----------------|----------|------------------|
|         | Mean         | (95% CI)         | Before CP | (95% CI)        | After CP | (95% CI)         |
| CERADts | 75,0         | (80,72 to 89,24) | 0,02      | (-0,30 to 0,34) | -2,20    | (-2,41 to -1,99) |
| MMSE    | 29,8         | (28,76 to 30,85) | 0,05      | (-0,04 to 0,15) | -0,74    | (-0,82 to -0,66) |
| WLR     | 7,6          | (6,95 to 8,19)   | -0,01     | (-0,07 to 0,05) | -0,25    | (-0,28 to -0,22) |
| WLM     | 20,4         | (18,90 to 21,90) | -0,07     | (-0,18 to 0,05) | -0,61    | (-0,68 to -0,55) |
| WLRd    | 9,8          | (9,26 to 10,32)  | 0,02      | (-0,05 to 0,08) | -0,31    | (-0,34 to -0,27) |
| VF      | 22,4         | (20,43 to 24,30) | 0,1       | (-0,04 to 0,24) | -0,49    | (-0,56 to -0,41) |
| BNT     | 13,8         | (13,06 to 14,52) | -0,02     | (-0,08 to 0,03) | -0,19    | (-0,23 to -0,16) |
| CPT     | 10,6         | (9,82 to 11,33)  | 0,02      | (-0,02 to 0,06) | -0,34    | (-0,38 to -0,30) |

CI: Confidence interval; MMSE: Minimal state examination, CERADts: Total score of CERAD; WLR: Word list recall; WLM: Word list memory, WLRd: Word list recognition (Discrimination); VF: Verbal fluency; BNT: 15-item Boston naming test; CPT: Constructional praxis. †Adjusted by sex, education, socioeconomic status, residence area, occupation type, marital status, hypertension, dyslipidemia
